# Supplementary material for: Assembly of hepatitis E vaccine by ‘in situ’ growth of gold clusters as nano-adjuvants: an efficient way to enhance the immune responses of vaccination
Source: Royal Society of Chemistry journal article supplement (doi:10.1039/c6nh00087h), 2016-01-01
Supplement: c6nh00087h1.pdf [file c6nh00087h1.pdf]

## Electronic Supplementary Information

### **Assemble Hepatitis E Vaccine by ‘in situ’ Growing Gold Clusters as Nano Adjuvant: An Efficient Way to Enhance the Immune Responses of Vaccination**

Hai Wang<sup>a</sup>, Yanping Ding<sup>a</sup>, Shishuai Su<sup>a</sup>, Duojia Meng<sup>b</sup>, Ayeesha Mujeeb<sup>a</sup>, Yan Wu<sup>a\*</sup>,  
Guangjun Nie<sup>a\*</sup>

<sup>a</sup> *CAS Key Laboratory for Biomedical Effects of Nanomaterials and Nanosafety, National Center for Nanoscience and Technology (NCNST), Beiyitia, Zhongguancun, Beijing 100190, China.*

<sup>b</sup> *Changchun Institute of Biological Products Co., ltd, 3456 Xian road, Changchun city, 130062, China.*

\*Correspondence should be addressed to:

CAS Key Laboratory for Biomedical Effects of Nanomaterials and Nanosafety  
National Center for Nanoscience and Technology (NCNST)  
Beiyitia, Zhongguancun  
Beijing 100190, China  
Email: [niegj@nanoctr.cn](mailto:niegj@nanoctr.cn) or [wuy@nanoctr.cn](mailto:wuy@nanoctr.cn)

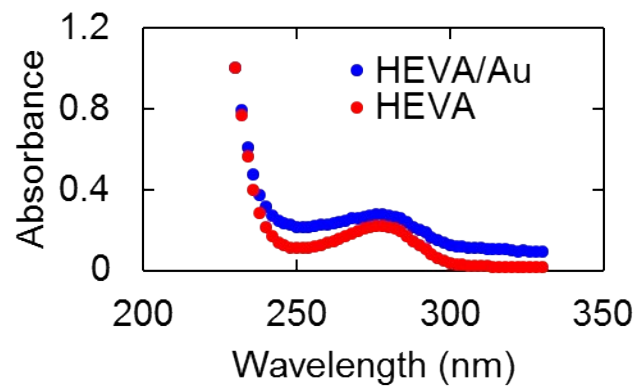

**Fig. S1.** UV/Vis absorbance of HEVA and HEVA/Au. Both HEVA and HEVA/Au have a major absorbance peak at 280 nm.

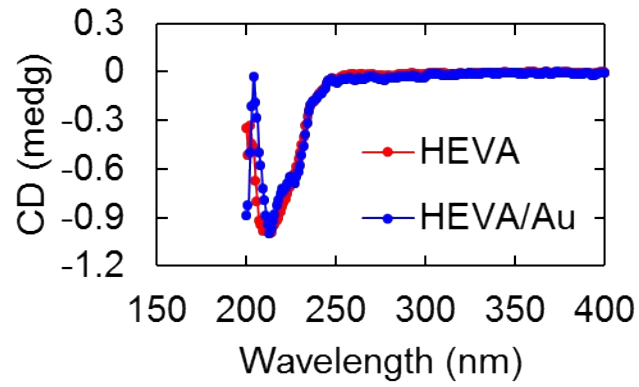

**Figure S2.** Circular dichroism (CD) spectroscopy of HEVA and HEVA/Au, showing the Au cluster didn't change the secondary structure of the vaccine.

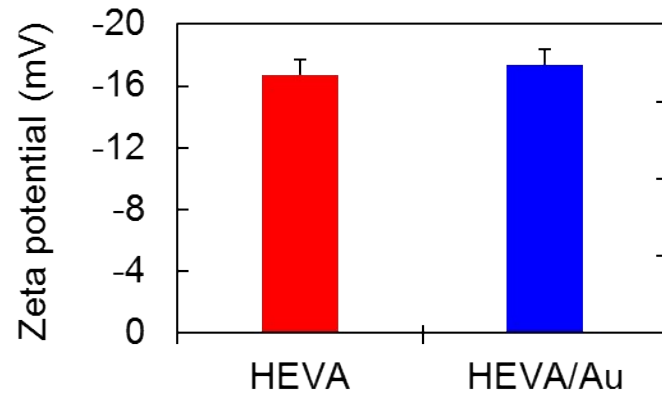

**Figure S3.** Surface zeta potential of HEVA and HEVA/Au showing the Au cluster have no effects on the surface charge of the vaccine. The zeta potential was determined by DLS.

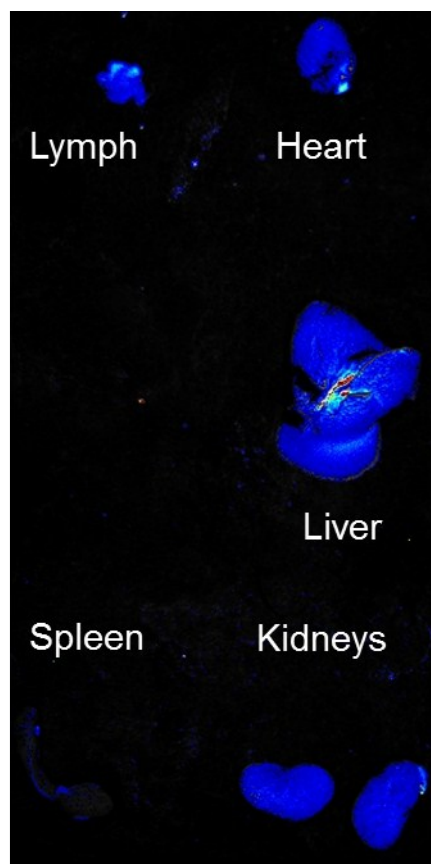

**Figure S4.** *Ex vivo* imaging of different organs from mouse treated with HEVA/Au after injection for 6 h. Excitation wavelength, 350 nm; Emission wavelength, 450 nm. This image showed the *in vivo* imaging capability of HAVA/Au, which can be used for the monitoring of the biodistribution of vaccine.

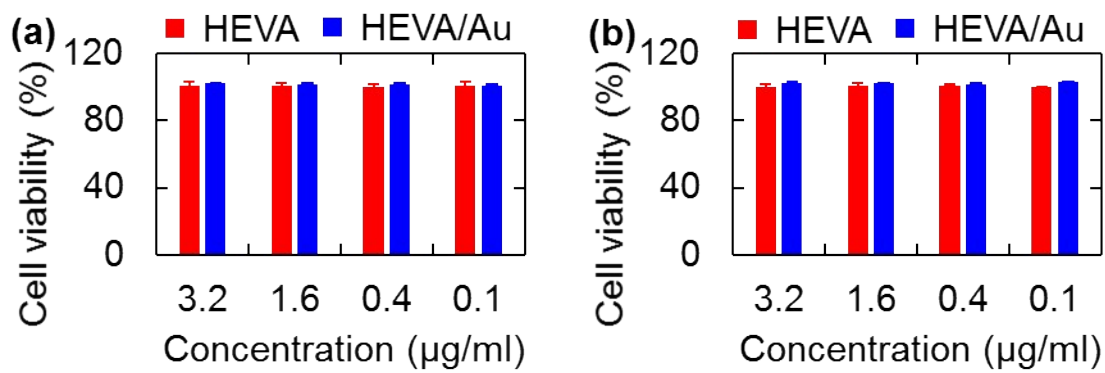

**Figure S5.** *In vitro* cell viability of HepG2 cells (a) and iDC cells (b) after incubating with low concentrations of both HEVA and HEVA/Au for 24h. The cell viability was determined by CCK-8 assay.
